# Supplementary material for: Identification of a novel Bax–Cdk1 signalling complex that links activation of the mitotic checkpoint to apoptosis
Source: Oxford University Press journal article supplement (doi:10.1242/jcs.244152), 2021-03-15
Supplement: jcs244152supp.pdf [file jcs244152supp.pdf]

## Supplementary information

**Table S1**

| Protein                                                    | Bax IP |              | Bak IP |              |
|------------------------------------------------------------|--------|--------------|--------|--------------|
|                                                            | Score  | Coverage (%) | Score  | Coverage (%) |
| ADP/ATP translocase 2 OS=Homo sapiens                      | 410    | 35           | 317    | 27           |
| ADP/ATP translocase 3 OS=Homo sapiens                      | 280    | 29           | 233    | 23           |
| 60 kDa heat shock protein, mitochondrial OS=Homo sapiens   | 426    | 23           | 256    | 12           |
| 14-3-3 protein zeta/delta OS=Homo sapiens                  | 363    | 36           | 169    | 18           |
| Apoptosis regulator BAX OS=Homo sapiens                    | 776    | 55           | 459    | 35           |
| Bcl-2 homologous antagonist/killer OS=Homo sapiens GN=BAK1 | 49     | 5.8          | 259    | 33           |
| Peptidyl-prolyl cis-trans isomerase OS=Homo sapiens        | 370    | 37           | 139    | 30           |
| ATP synthase subunit alpha, mitochondrial OS=Homo          | 169    | 26           | 386    | 22           |
| ATP synthase subunit beta OS=Homo sapiens                  | 196    | 13           | 210    | 23           |
| L-lactate dehydrogenase A chain OS=Homo sapiens            | 236    | 26           | 98     | 16           |
| Serpin H1 OS=Homo sapiens                                  | 250    | 15           | 310    | 36           |
| Myosin regulatory light chain 12A OS=Homo sapiens          | 279    | 32           | 537    | 49           |
| 60S acidic ribosomal protein P0 OS=Homo sapiens            | 76     | 15           | 40     | 22           |
| Cyclin-dependent kinase 1 OS=Homo sapiens                  | 139    | 16           |        |              |
| Nucleophosmin OS=Homo sapiens                              | 247    | 35           |        |              |
| Heterogeneous nuclear ribonucleoprotein M OS=Homo sapiens  | 345    | 18           |        |              |
| ATP-dependent RNA helicase DDX5 OS=Homo sapiens            | 146    | 9.9          |        |              |
| Triosephosphate isomerase OS=Homo sapiens                  | 207    | 24           |        |              |
| Tropomyosin alpha-4 chain OS=Homo sapiens                  | 117    | 14           |        |              |
| Clusterin OS=Homo sapiens                                  | 234    | 15           |        |              |
| Nucleoside diphosphate kinase OS=Homo sapiens              | 189    | 17           |        |              |
| Transgelin-2 OS=Homo sapiens                               | 88     | 23           |        |              |
| Heterogeneous nuclear ribonucleoprotein K OS=Homo sapiens  | 74     | 10           |        |              |
| Protein disulfide-isomerase OS=Homo sapiens                | 160    | 17           |        |              |
| Receptor of-activated protein C kinase 1 OS=Homo sapiens   | 218    | 24           |        |              |

|                                                                       |     |     |     |     |
|-----------------------------------------------------------------------|-----|-----|-----|-----|
| Galectin-1 OS=Homo sapiens                                            | 66  | 19  |     |     |
| Reticulocalbin-1 OS=Homo sapiens                                      | 90  | 17  |     |     |
| DnaJ homolog subfamily A member 3, mitochondrial OS=Homo sapiens      | 70  | 11  |     |     |
| Drebrin OS=Homo sapiens                                               | 71  | 8.8 |     |     |
| Heterogeneous nuclear ribonucleoproteins C1/C2 OS=Homo sapiens        | 138 | 26  |     |     |
| 10 kDa heat shock protein, mitochondrial OS=Homo sapiens              | 76  | 35  |     |     |
| Brain acid soluble protein 1 OS=Homo sapiens                          | 52  | 28  |     |     |
| Plasminogen activator inhibitor 1 RNA-binding protein OS=Homo sapiens | 87  | 9.3 |     |     |
| Heterogeneous nuclear ribonucleoprotein D0 OS=Homo sapiens            | 137 | 12  |     |     |
| Heterogeneous nuclear ribonucleoprotein A/B OS=Homo sapiens           | 110 | 11  |     |     |
| Filamin-A OS=Homo sapiens                                             | 867 | 15  |     |     |
| Tripartite motif-containing protein 47 OS=Homo sapiens                |     |     | 778 | 26  |
| Probable ATP-dependent RNA helicase DDX41 OS=Homo sapiens             |     |     | 653 | 33  |
| Erlin-2 OS=Homo sapiens                                               |     |     | 718 | 44  |
| Erlin-1 OS=Homo sapiens                                               |     |     | 661 | 49  |
| Voltage-dependent anion-selective channel protein 1 OS=Homo sapiens   |     |     | 545 | 34  |
| Voltage-dependent anion-selective channel protein 2 OS=Homo sapiens   |     |     | 423 | 40  |
| Phosphate carrier protein, mitochondrial OS=Homo sapiens              |     |     | 61  | 8.3 |
| Stress-70 protein, mitochondrial OS=Homo sapiens                      |     |     | 657 | 25  |
| Mitochondrial carrier homolog 2                                       |     |     | 69  | 16  |
| Transmembrane emp24 domain-containing protein 10 OS=Homo sapiens      |     |     | 150 | 22  |
| Leucine-rich repeat-containing protein 59 OS=Homo sapiens             |     |     | 68  | 15  |
| Surfeit locus protein 4 OS=Homo sapiens                               |     |     | 199 | 15  |
| Tropomyosin beta chain OS=Homo sapiens                                |     |     | 237 | 17  |
| Putative RNA-binding protein Luc7-like 2 OS=Homo sapiens              |     |     | 226 | 24  |
| RNA-binding protein 39 OS=Homo sapiens                                |     |     | 189 | 20  |
| Lamin-B1 OS=Homo sapiens                                              |     |     | 139 | 14  |
| Very-long-chain enoyl-CoA reductase OS=Homo sapiens                   |     |     | 136 | 13  |
| Sequestosome-1 OS=Homo sapiens                                        |     |     | 67  | 9.8 |
| Calnexin OS=Homo sapiens                                              |     |     | 111 | 8.4 |
| Transmembrane emp24 domain-containing protein 10 OS=Homo sapiens      |     |     | 150 | 22  |

|                                                                                               |  |  |     |     |
|-----------------------------------------------------------------------------------------------|--|--|-----|-----|
| 4F2 cell-surface antigen heavy chain OS=Homo sapiens                                          |  |  | 60  | 6.5 |
| Voltage-dependent anion-selective channel protein 3 OS=Homo sapiens                           |  |  | 290 | 23  |
| Surfeit locus protein 4 OS=Homo sapiens                                                       |  |  | 199 | 15  |
| Polypeptide N-acetylgalactosaminyltransferase 2 OS=Homo sapiens                               |  |  | 69  | 5.1 |
| Leucine-richrepeat-containing protein 59 OS=Homo sapiens                                      |  |  | 68  | 15  |
| Dolichyl-diphosphooligosaccharide--protein glycosyltransferase 48 kDa subunit OS=Homo sapiens |  |  | 101 | 6.4 |
| Mitochondrial carrier homolog 2 OS=Homo sapiens                                               |  |  | 69  | 16  |
| Bleomycin hydrolase OS=Homo sapiens                                                           |  |  | 64  | 14  |
| Serpin B3 OS=Homo sapiens                                                                     |  |  | 86  | 6.7 |
| Desmocollin-1 OS=Homo sapiens                                                                 |  |  | 106 | 3.9 |

Identification of Bax and Bak interacting proteins. Bax and Bak were immunoprecipitated from synchronised HeLa cell mitotic cell lysates (60nM Taxol treatment for 24h) and the co-immunoprecipitating proteins identified by trypsin digestion and mass spectrometry (MS). Score=Mascot score, Cov= % sequence coverage.

**Fig S1**

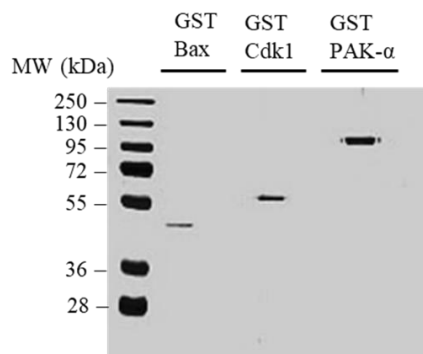

Coomassie-stained SDS-PAGE gel of purified, recombinant GST-Bax, GST-Cdk1 and GST-Pak $\alpha$  used in the study. Molecular weight markers (kDa) are indicated on the left.

**Fig S2**

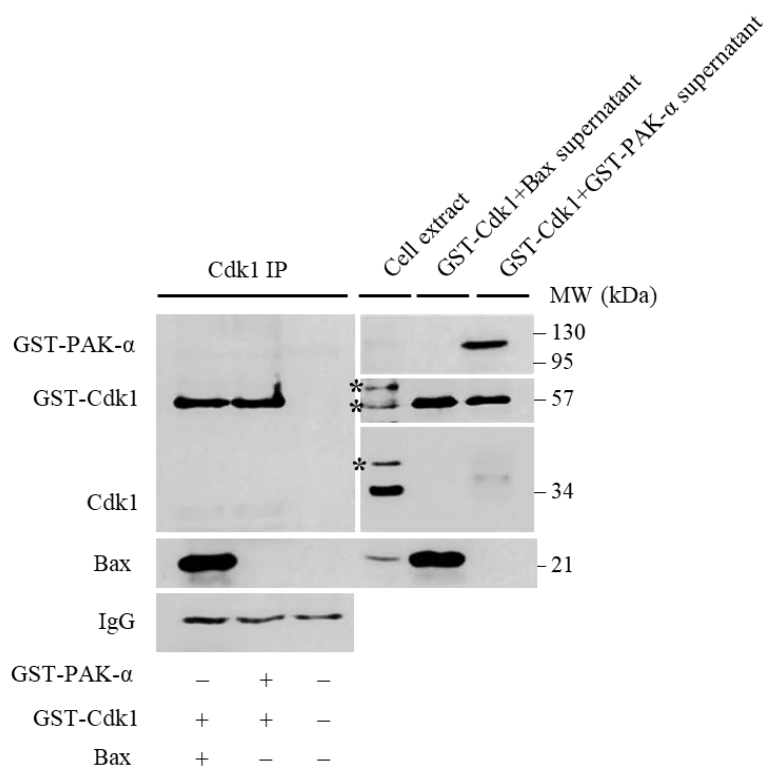

Immunoblot analysis of Cdk1[Cdc2p34(17)] IP's with the indicated antibodies. Equimolar concentrations (50  $\mu$ M) of GST-Cdk1 and Bax were incubated in 1% CHAPS lysis buffer for 2 hrs at 4 °C. GST-PAK alpha (50  $\mu$ M) was incubated with GST-Cdk1 as a control. The post-IP supernatants (10 % of total volume) and cell lysate were run as positive controls. Molecular weight markers (kDa) are indicated on the right. \* indicates non-specific proteins. This result is representative of 2 independent experiments.
